# Supplementary material for: Prognostic Roles of BRAF, KIT, NRAS, IGF2R and SF3B1 Mutations in Mucosal Melanomas
Source: MDPI journal article supplement (doi:10.3390/cells10092216), 2021-08-27
Supplement: s1 [file s1]

**Supplemental Table S1:** Primers for polymerase chain reaction amplification and sequencing.

| Gene                      | Forward                                    | Reverse                                   |
|---------------------------|--------------------------------------------|-------------------------------------------|
| BRAF exon 15              | AG-CATCTCAGGGCCAAAAAT                      | TGCTTGCTCTGA-TAGGAAAATG                   |
| KIT exon 11               | CTCTCCAGAG-TGCTCTAATGAC                    | AGCCACTGGAG-TTCCTTAAAG                    |
| KIT exon 13               | CGGCCATGACTGTGCTGT-TAA                     | CAATAAAAGGCAGCTT-GGACACG                  |
| KIT exon 17               | CACAG-GAAACAATTTTTATCGAAAGTTGAAAC          | TGAATTTAAATGGTTTTCTTCTCTCTCCAAC           |
| NRAS exon 1               | GATGTGGCTCGCCAATTAA C                      | CCGACAAGTGAGAGACAGGA                      |
| NRAS exon 2               | TTGCATTCCCTGTGGTTTTT                       | TGGTAAC-CTCATTTCCCCATA                    |
| SF3B1 codon 625 (exon 14) | CCAACTCATGACTGTCCTTTCTT                    | TGCCAGGACTTCTTGCTTTT                      |
| SF3B1 codon 666 (exon 14) | TTTGCTGTTGTAGCCTCTGC                       | CAACTTAC-CATGTTCAATGATTTC                 |
| SF3B1 codon 700 (exon 15) | TTGAGAGAATCTGGATGATATTGTG                  | GGCGGATACCCTTCCATAAA                      |
| IGF2R exon 2              | TGTAAAACGACGGCCAG-Taactagagagaagttaattttga | CAGGAAACAGCTATGAC-Cgcaaaattggggaatcata    |
| IGF2R exon 6              | TGTAAAACGACGGCCAG-Tgtctaagggtacgtgtgatt    | CAGGAAACAGC-TATGACCcaggtccttctgtggagat    |
| IGF2R exon 8              | TGTAAAACGACGGCCAGT-gcattaagctgcatgaaaca    | CAGGAAACAGC-TATGACCcctctctcgatccccttctt   |
| IGF2R exon 16             | TGTAAAACGACGGCCAG-Tcagccttggagtgtctctg     | CAGGAAACAGC-TATGACCcccaccacaggcatgag-tat  |
| IGF2R exon 43             | TGTAAAACGACGGCCAGTg-cagtcttccttatgtctgg    | CAGGAAACAGC-TATGACCcggcattgtgtggttaattt   |
| IGF2R exon 46             | TGTAAAACGACGGCCAG-Tctgtggcagcaggaccac      | CAGGAAACAGC-TATGACCaaaactgaccccaa-gattagc |

**Supplemental Table S2:** IGF2R methods. In order to select promising variants for further experimental validation, we performed the hard filtering according to GATK good practices with the criteria as follows:

For the single nucleotide variants:

Variant Confidence/Quality by Depth < 2.0

Phred-scaled p-value using Fisher's exact test to detect strand bias > 60;

RMS Mapping Quality < 40;

Z-score From Wilcoxon rank sum test of Alt vs. Ref read mapping qualities < -12.5;

Z-score from Wilcoxon rank sum test of Alt vs. Ref read position bias < -8.0.

For the indels:

Variant Confidence/Quality by Depth < 2.0;

Phred-scaled p-value using Fisher's exact test to detect strand bias > 200;

Z-score from Wilcoxon rank sum test of Alt vs. Ref read position bias < -20.

Afterward, we selected only the variants characterized by QUAL  $\geq$  30 (Phred-scaled quality score) and DP  $\geq$  5 (read depth at particular position). Finally, we focused only on variants present in coding sequences of particular genes. Only detected variants with a high score for predicted pathogenicity were chosen for verification in the mucosal melanoma sample cohort, as shown in the table below.

| Primary site | IGF2R variants                                                                                                                                                                                                   |
|--------------|------------------------------------------------------------------------------------------------------------------------------------------------------------------------------------------------------------------|
| Vulvovaginal | c.4855A>G   p.Arg1619Gly; c.6059A>G   p.Asn2020Ser;<br>c.7376C>T   p.Ala2459Val<br>c.4687G>A   p.Val1563Met<br>c.2609T>A   p.Val870Glu                                                                           |
| Sinonasal    | c.259G>A   p.Asp87Asn<br>c.685C>T   p.Pro229Ser<br>c.754C>G   p.Leu252Val<br>c.6329T>C   p.Ile2110Thr<br>c.2156G>C   p.Arg719Thr<br>c.923A>G   p.Tyr308Cys<br>c.910T>C   p.Ser304Pro<br>c.6913G>C   p.Ala2305Pro |
| Anorectal    | c.6833G>T   p.Cys2278Phe                                                                                                                                                                                         |

**Supplemental Table S3:** The single nucleotide variants and indel gene targets covered by the next-generation sequencing tests are as follows (exons).

ABL1(4–7), AKT1 (3,6), ALK (21–23,25), APC (16), ARID1A (1–20), ATM (1–63), ATRX(1–35), AURKA (2,5–8), BRAF (11,15), BRCA1 (2–23), BRCA2 (2–27), CCNB1(2,[3-partial],5,[6-partial],7), CCND2 ([2-partial],3-4,[5-partial]), CCND3 (2–5-partial), CCNE1 (3–8,10,12), CDH1 (1–16), CDK4 (2–7), CDK6 (6), CDKN2A (1–3), CIC (1–20), CSF1R (7,22), CTNNB1 (3), DAXX (1–8), DDR2 (12–18), DDX3X (1–17), EGFR (3,7,15,18–21), ERBB2 (8,10,19–21,24), ERBB3 (2–3,7–8), ERBB4 (3–4,6–9,15,23), ESR1 (8), EZH2 (16), FBXW7 (1–11), FGFR1 (4,7–8,13,15,17), FGFR2 (7,9,12,14), FGFR3 (7–9,14–6,18), FLT3 (11,14,16,20), FOXL2 (1), GNA11 (5), GNAQ (4–5), GNAS (6–9), H3F3A (2), HNF1A (3–4), HRAS (2–3), IDH1 (3–4), IDH2 (4), JAK2 (11,13–14,16,19), JAK3 (4,13,16), KDR (6, 7,11,19,21,26–27,30), KEAP1 (2–6), KIT (2,8–11,13–15,17–18), KRAS (2–5), MAP2K1 (2,3,6–7), MAP3K1 (1–20), MDM2 (2–4,6,8,10), MDM4 ([4-partial],5-6,[7,9–11-partial]), MEN1 (2–10), MET (2,11,14,16,19,21), MITF (1-partial), MLH1 (12), MPL (10), MSH6 (1–10), MSI, MYC (1–3), MYCN (3), NF1 (1–58), NF2 (1–5), NKX2-1 (1-partial), NOTCH1 (25–27,34), NPM1 (11), NRAS (2–5), PDGFRA (12,14–15,18,23), PIK3CA (2,5,7–8,10,14,19,21), PIK3R1 (1–10), POLE (9–14), PTCH1 (1–23), PTEN (1–9), PTPN11 (3,13), RB1 (1–27), RET (10–11,13–16), RHOA (2–3), RNF43 (2–10), ROS1 (36–38), SDHB (1–8), SMAD2 (7), SMAD4 (2–12), SMARCA4 (3–36), SMARCB1 (2,4,5,9), SMO (3,5–6,9,11), SRC (14), STAG2 (3–

34), STK11 (1–9), SUFU (1–12), TERT (1), TP53 (1–11), TP63 (1–14), TSC1 (3–23), TSC2 (2–42), TSHR (10), VHL (1–3).

**Supplemental Table S4:** Univariate Cox proportional hazards models.

|                         |     | Overall survival |                | Melanoma-specific survival |                | Progression-free survival |                |
|-------------------------|-----|------------------|----------------|----------------------------|----------------|---------------------------|----------------|
|                         |     | Hazard ratio     | <i>p</i> value | Hazard ratio               | <i>p</i> value | Hazard ratio              | <i>p</i> value |
| <b>NRAS mutation</b>    | 198 | 1.70             | 0.028 *        | 1.75                       | 0.03*          | 1.27                      | 0.25           |
| Vulvovaginal            | 61  | 2.93             | 0.032 *        | 2.74                       | 0.07           | 1.39                      | 0.36           |
| Sinonasal               | 93  | 1.4              | 0.27           | 1.55                       | 0.19           | 1.21                      | 0.58           |
| <b>KIT mutation</b>     | 197 | 0.98             | 0.91           | 0.89                       | 0.66           | 0.79                      | 0.24           |
| Vulvovaginal            | 60  | 0.72             | 0.36           | 0.59                       | 0.19           | 0.34                      | 0.0021*        |
| <b>BRAF mutation</b>    | 201 | 0.90             | 0.76           | 0.90                       | 0.76           | 0.97                      | 0.91           |
| Sinonasal               | 94  | 1.33             | 0.54           | 1.31                       | 0.61           | 3.06                      | 0.0045*        |
| <b>SF3B1 mutation</b>   | 133 | 0.66             | 0.27           | 0.60                       | 0.23           | 0.59                      | 0.12           |
| <b>IGF2R mutation</b>   | 138 | 0.58             | 0.085          | 0.62                       | 0.17           | 0.80                      | 0.41           |
| Stage (3–4 versus 1–2)  | 213 | 1.69             | 0.016 *        | 2.11                       | 0.0009*        | 346                       | <0.001*        |
| Age (> 65 years)        | 214 | 1.45             | 0.048 *        | 1.24                       | 0.29           | 0.84                      | 0.28           |
| Ulceration              | 202 | 1.65             | 0.027 *        | 1.49                       | 0.098          | 1.08                      | 0.68           |
| Mitoses (≥2)            | 199 | 0.94             | 0.78           | 0.99                       | 0.97           | 1.33                      | 0.17           |
| Perineural invasion     | 209 | 0.88             | 0.68           | 0.87                       | 0.68           | 1.48                      | 0.099          |
| Lymphovascular invasion | 209 | 0.93             | 0.78           | 1.08                       | 0.76           | 1.53                      | 0.031*         |
| Adjuvant therapy        | 198 | 0.96             | 0.857          | 1.11                       | 0.63           | 1.63                      | 0.0052*        |

\*  $p < 0.05$ , statistical significance

**Supplemental Table S5:** Geographic distribution of *NRAS*, *BRAF*, *KIT*, *SF3B1* and *IGF2R* mutations.

| Gene         | North America | Europe     | Asia       | North America versus Europe<br><i>p</i> value | North America versus Asia<br><i>p</i> value | Europe versus Asia<br><i>p</i> value |
|--------------|---------------|------------|------------|-----------------------------------------------|---------------------------------------------|--------------------------------------|
| <i>NRAS</i>  | 25/114 (22%)  | 9/41 (22%) | 3/43 (7%)  | 1.0                                           | 0.035*                                      | 0.65                                 |
| <i>BRAF</i>  | 15/117 (13%)  | 9/41 (22%) | 1/43 (2%)  | 0.21                                          | 0.071                                       | 0.0066*                              |
| <i>KIT</i>   | 30/119 (25%)  | 7/35 (20%) | 7/43 (16%) | 0.65                                          | 0.29                                        | 0.77                                 |
| <i>SF3B1</i> | 9/64 (14%)    | 3/29 (10%) | 8/40 (20%) | 0.75                                          | 0.43                                        | 0.34                                 |
| <i>IGF2R</i> | 13/66 (20%)   | 3/31 (10%) | 9/41 (22%) | 0.26                                          | 0.81                                        | 0.21                                 |

\*  $p < 0.05$ , statistical significance
